# Supplementary figures and images for: Findings of 18F‐PI‐2620 tau PET imaging in patients with Alzheimer’s disease and healthy controls in relation to the plasma P‐tau181 levels in a Japanese sample
Source: PubMed Central journal article supplement — Neuropsychopharmacol Rep. 2022 Jul 17;42(4):437–48. doi: 10.1002/npr2.12281 (PMC9773651; doi:10.1002/npr2.12281), 2022-07-17

# Medial Temporal Region

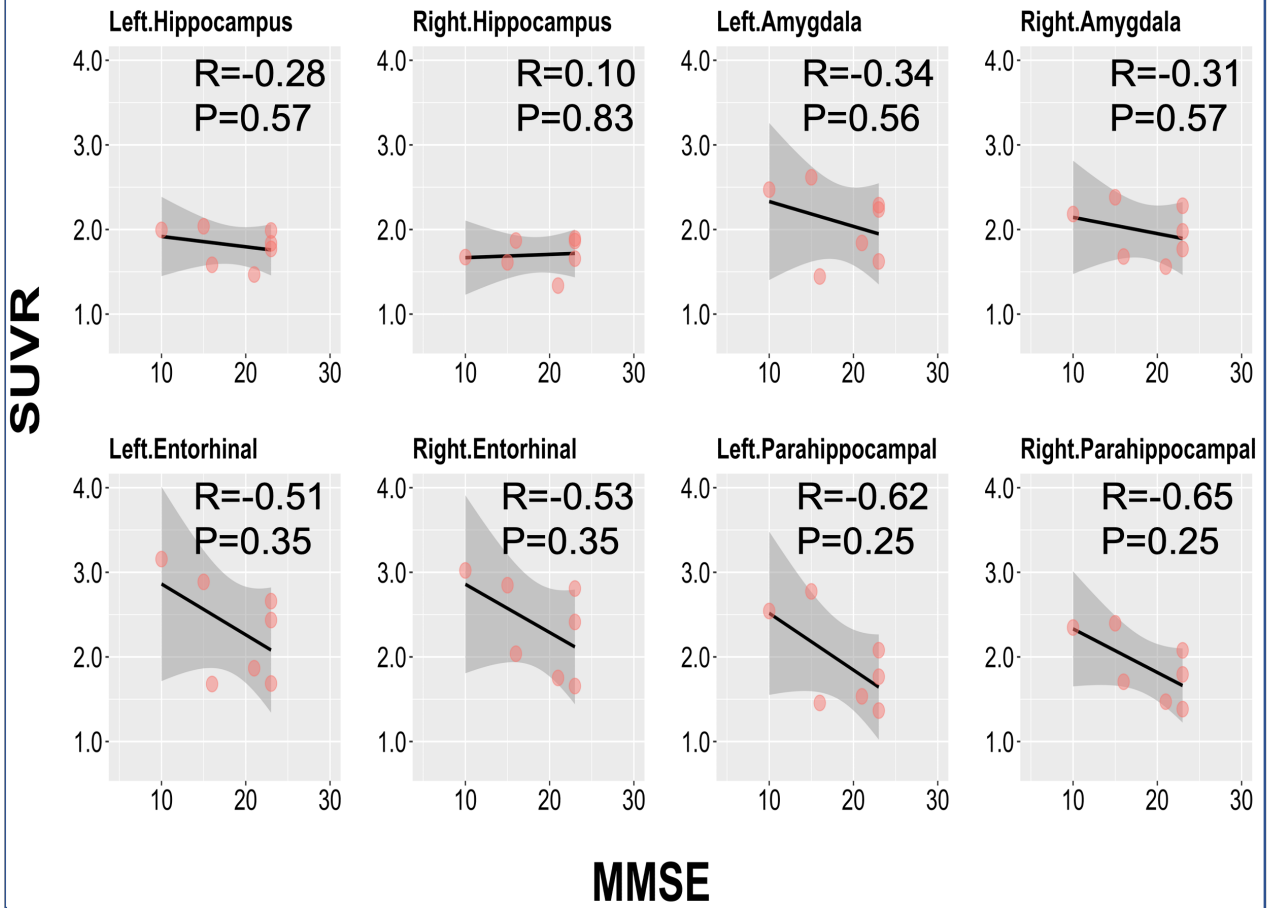

# Neocortex

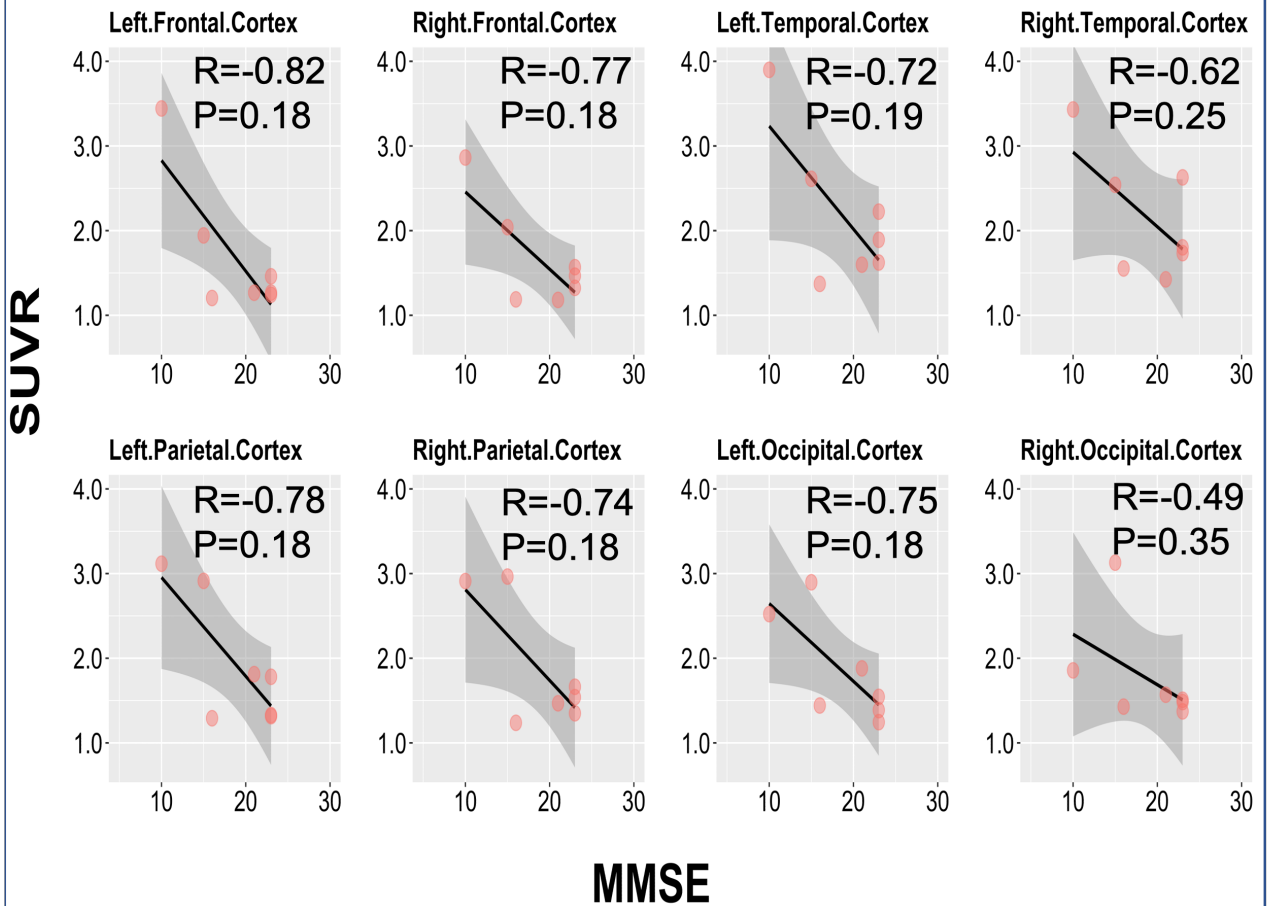

Supplement: NPR2-42-437-s001.pdf [file NPR2-42-437-s001.pdf]

# Medial Temporal Region

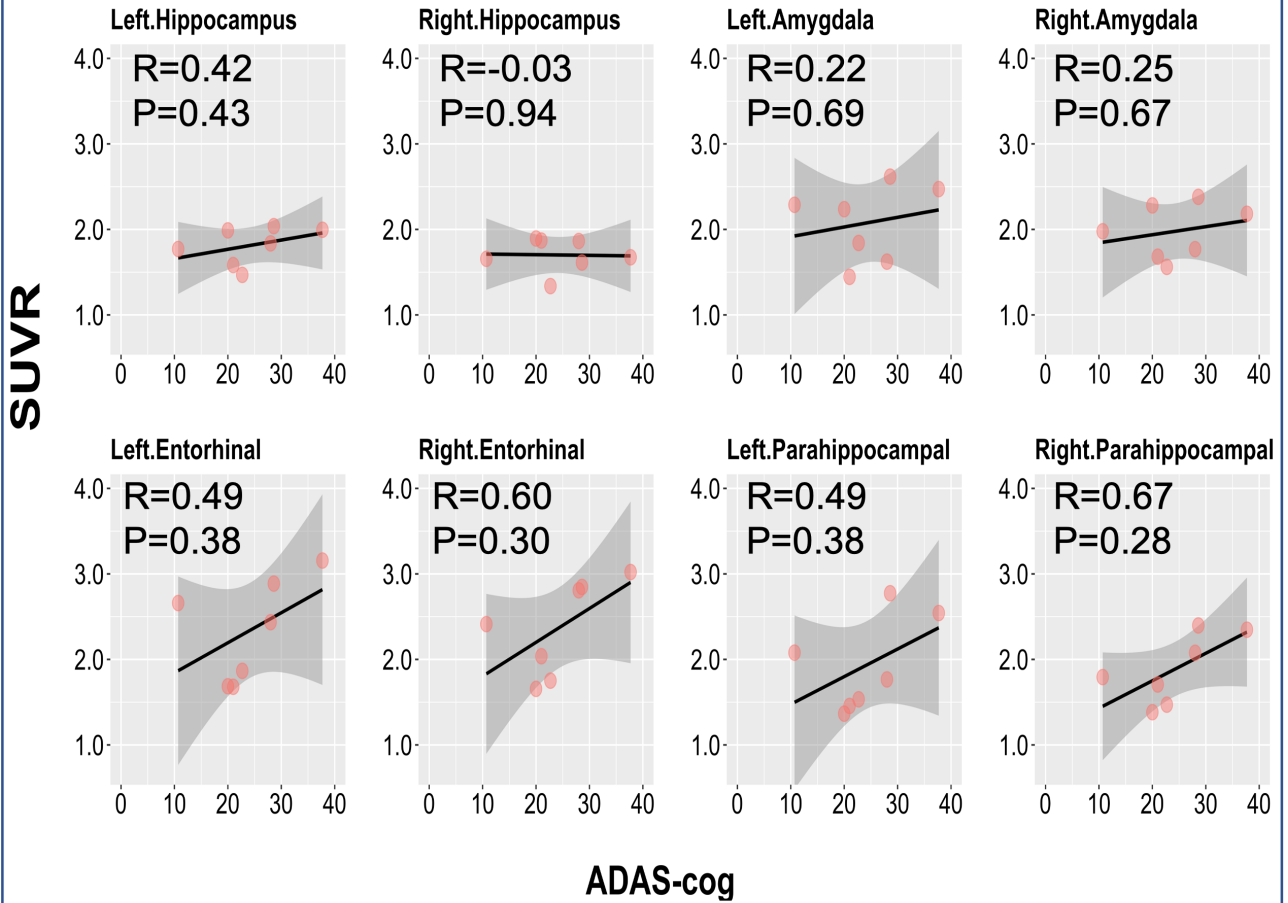

# Neocortex

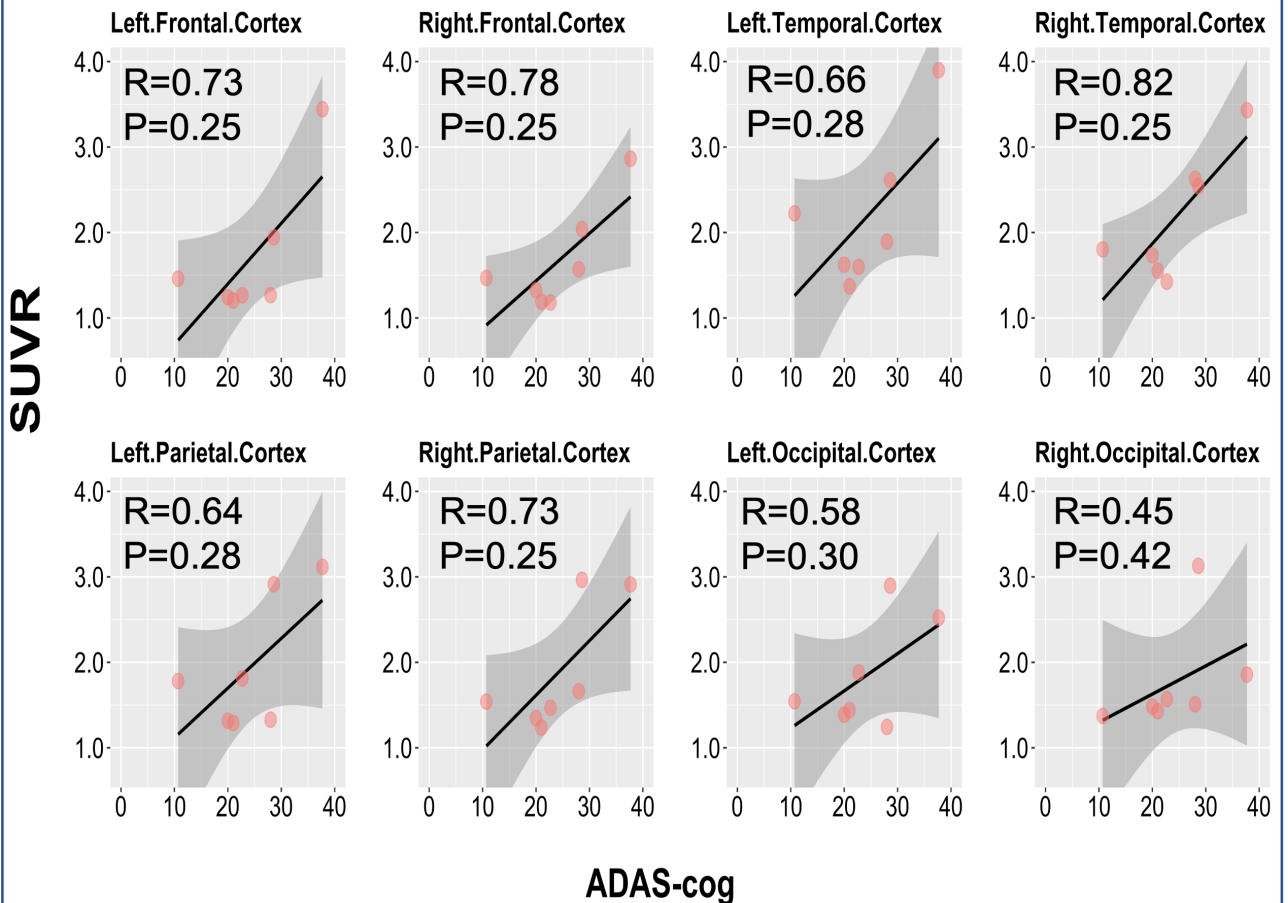

Supplement: NPR2-42-437-s002.pdf [file NPR2-42-437-s002.pdf]

# Medial Temporal Region

SUVR

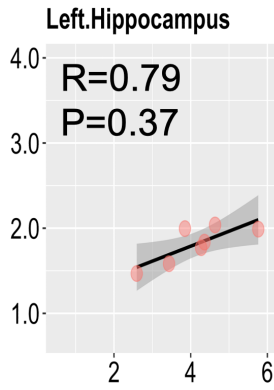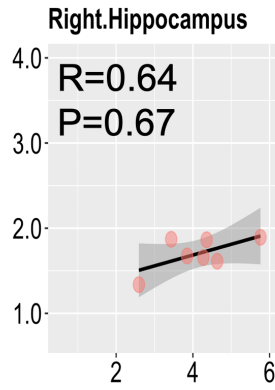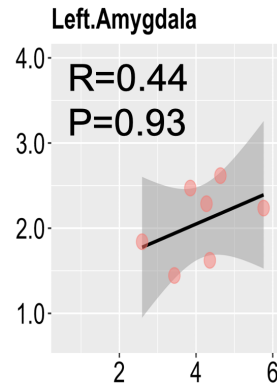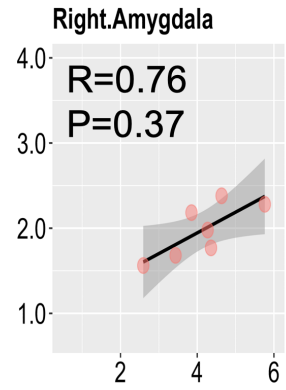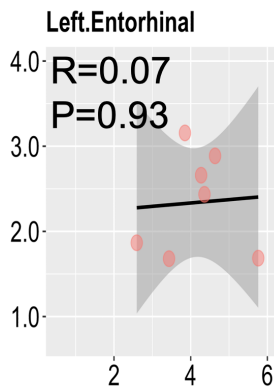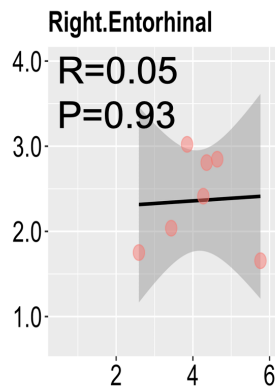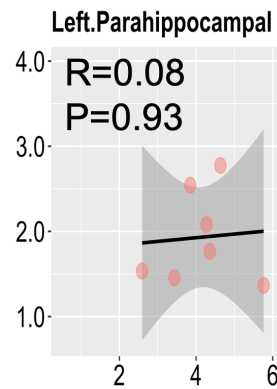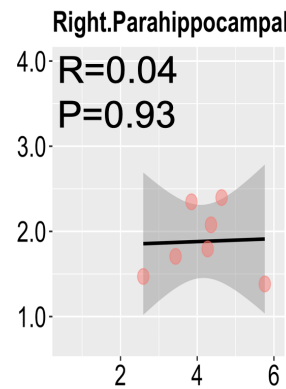

p-tau181

# Neocortex

SUVR

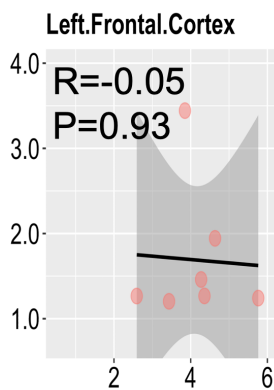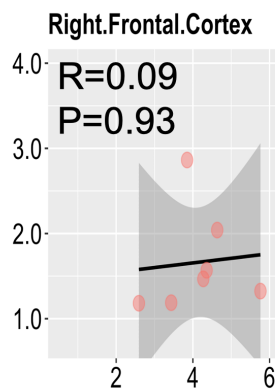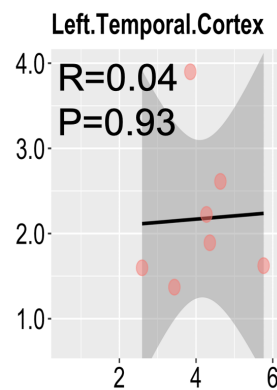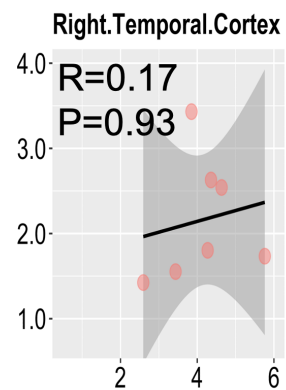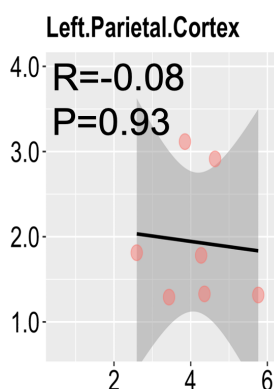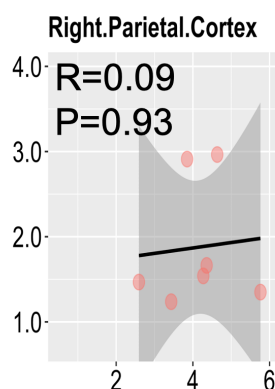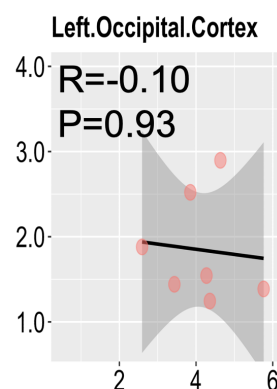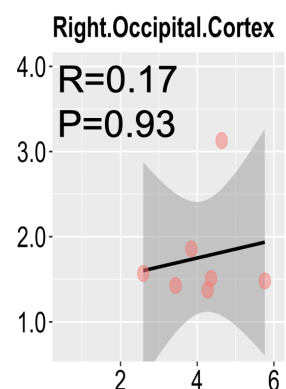

p-tau181

Supplement: NPR2-42-437-s004.pdf [file NPR2-42-437-s004.pdf]
